# Supplementary material for: The Characteristics and Expression Profile of Peptidoglycan Recognition Protein 2 in the Accessory Nidamental Gland of the Bigfin Reef Squid During Bacterial Colonization
Source: Frontiers journal article supplement (doi:10.3389/fmars.2022.825267), 2022-05-30
Supplement: Table_1.pdf [file Table_1.pdf]

**Table S1. The characteristics of sampled female squids.**

| Sampling date | Gender | ML (cm) | BW (g) | GW (g) | GSI (%) | Gonadal stage | ANG stage | Reproductive phase |
|---------------|--------|---------|--------|--------|---------|---------------|-----------|--------------------|
| Sep, 2016     | F      | 12.5    | 126.2  | < 0.1  | N.A.    | PO            | stage 1   | Juvenile female    |
| Sep, 2016     | F      | 15.5    | 205.2  | < 0.1  | N.A.    | PO            | stage 1   | Juvenile female    |
| Sep, 2016     | F      | 15.5    | 196.0  | < 0.1  | N.A.    | PO            | stage 1   | Juvenile female    |
| Sep, 2016     | F      | 14.5    | 211.4  | < 0.1  | N.A.    | PO            | stage 1   | Juvenile female    |
| Oct, 2015     | F      | 19.5    | 397.5  | 0.4    | 0.1     | MFO           | stage 2   | Immature female    |
| Oct, 2015     | F      | 20.5    | 457.4  | 0.4    | 0.1     | MFO           | stage 2   | Immature female    |
| Oct, 2015     | F      | 19.5    | 396.5  | 0.4    | 0.1     | PVO           | stage 2   | Immature female    |
| Oct, 2015     | F      | 24.0    | 688.5  | 0.6    | 0.1     | MFO           | stage 2   | Immature female    |
| Oct, 2015     | F      | 22.8    | 571.2  | 0.4    | 0.1     | PVO           | stage 2   | Immature female    |
| Nov, 2015     | F      | 14.5    | 175.8  | 0.5    | 0.3     | PVO           | stage 2   | Immature female    |
| Nov, 2015     | F      | 15.5    | 216.5  | 0.4    | 0.2     | PVO           | stage 2   | Immature female    |
| Nov, 2015     | F      | 17.0    | 195.7  | 0.5    | 0.2     | PVO           | stage 2   | Immature female    |
| Nov, 2015     | F      | 24.0    | 713.5  | 0.7    | 0.1     | PVO           | stage 2   | Immature female    |
| Nov, 2015     | F      | 25.0    | 789.1  | 0.9    | 0.1     | PVO           | stage 2   | Immature female    |
| Oct, 2016     | F      | 18.0    | 302.3  | 0.2    | 0.1     | PVO           | stage 2   | Immature female    |
| Oct, 2016     | F      | 18.0    | 308.3  | 0.3    | 0.1     | PVO           | stage 2   | Immature female    |
| Oct, 2016     | F      | 17.5    | 310.7  | < 0.1  | N.A.    | MFO           | stage 2   | Immature female    |
| Nov, 2016     | F      | 26.0    | 912.0  | 0.6    | 0.1     | MFO           | stage 2   | Immature female    |
| Nov, 2015     | F      | 26.0    | 938.3  | 1.3    | 0.1     | EVO           | stage 3   | Maturing female    |
| Dec, 2015     | F      | 25.0    | 818.3  | 2.7    | 0.3     | EVO           | stage 3   | Maturing female    |
| Dec, 2015     | F      | 23.5    | 774.5  | 0.7    | 0.1     | EVO           | stage 3   | Maturing female    |
| Nov, 2016     | F      | 23.0    | 717.0  | 0.8    | 0.1     | EVO           | stage 3   | Maturing female    |
| Feb, 2016     | F      | 22.0    | 611.8  | 1.0    | 0.2     | EVO           | stage 3   | Maturing female    |
| Dec, 2016     | F      | N.D.    | N.D.   | N.D.   | N.A.    | EVO           | stage 3   | Maturing female    |
| Dec, 2016     | F      | 21.0    | 542.0  | N.D.   | N.A.    | EVO           | stage 3   | Maturing female    |
| Dec, 2016     | F      | N.D.    | N.D.   | N.D.   | N.A.    | EVO           | stage 3   | Maturing female    |
| Jan, 2017     | F      | 22.5    | 535.6  | N.D.   | N.A.    | EVO           | stage 3   | Maturing female    |
| Feb, 2017     | F      | 24.0    | 735.5  | 0.5    | 0.1     | EVO           | stage 3   | Maturing female    |
| Feb, 2017     | F      | 27.0    | 1120.0 | 0.7    | 0.1     | EVO           | stage 3   | Maturing female    |
| Mar, 2017     | F      | 26.0    | 856.0  | N.D.   | N.A.    | EVO           | stage 3   | Maturing female    |
| Oct, 2015     | F      | 21.5    | 552.2  | 15.9   | 2.9     | RO            | stage 4   | Mature female      |
| Dec, 2015     | F      | 26.0    | 986.8  | 12.1   | 1.2     | RO            | stage 4   | Mature female      |
| Feb, 2016     | F      | 26.0    | 883.6  | 15.6   | 1.8     | RO            | stage 4   | Mature female      |
| Apr, 2016     | F      | 29.0    | 1232.5 | N.D.   | N.A.    | LVO           | stage 4   | Mature female      |
| Feb, 2017     | F      | 25.5    | 991.0  | 10.5   | 1.1     | RO            | stage 4   | Mature female      |
| Mar, 2017     | F      | 25.0    | 744.0  | 9.0    | 1.2     | LVO           | stage 4   | Mature female      |
| Mar, 2017     | F      | 29.0    | 1159.0 | 16.5   | 1.4     | LVO           | stage 4   | Mature female      |
| Mar, 2017     | F      | 33.0    | 1787.0 | 27.5   | 1.5     | RO            | stage 4   | Mature female      |
| Mar, 2017     | F      | 32.0    | 1650.0 | 20.2   | 1.2     | RO            | stage 4   | Mature female      |
